# Supplementary material for: Chronic alcohol drinking persistently suppresses thalamostriatal excitation of cholinergic neurons to impair cognitive flexibility
Source: JCI journal article supplement (doi:10.1172/jci154969), 2021-12-23
Supplement: sd1 [file 1]

301 Moved Permanently

# Moved Permanently

The document has moved here.
